# Supplementary figures and images for: Research progress on ginger polysaccharides: extraction, purification and structure–bioactivity relationship
Source: Royal Society of Chemistry journal article supplement (doi:10.1039/d3fo03552b), 2023-01-01

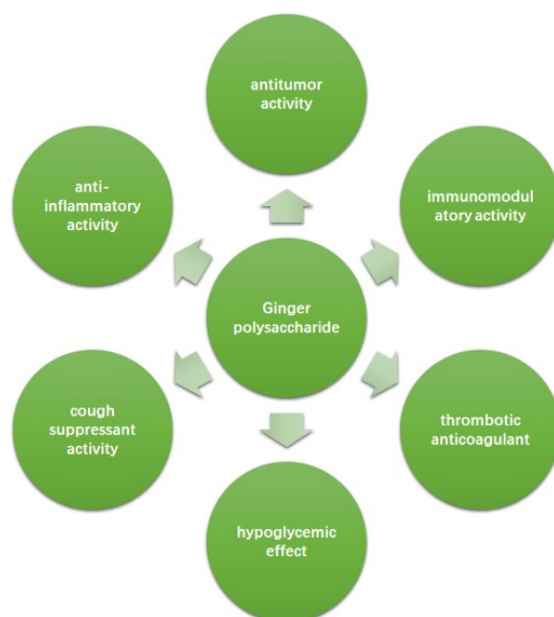

**Fig.S1.** Biological activity of ginger polysaccharide .

Supplement: d3fo03552b1.pdf [file d3fo03552b1.pdf]
